# Supplementary material for: Safety of Immune Checkpoint Inhibitors in Elderly Patients: An Observational Study
Source: MDPI journal article supplement (doi:10.3390/curroncol28050283), 2021-08-25
Supplement: s1 [file s1]

# Safety of Immune Checkpoint Inhibitors in Elderly Patients: An Observational Study

Agnese Paderi <sup>1,†</sup>, Sara Fancelli <sup>1,†</sup>, Enrico Caliman <sup>1,2</sup>, Serena Pillozzi <sup>1</sup>, Elisabetta Gambale <sup>1</sup>, Marinella Micol Mela <sup>1</sup>, Laura Doni <sup>1</sup>, Francesca Mazzoni <sup>1</sup> and Lorenzo Antonuzzo <sup>1,2,\*</sup>

## Supplementary material

**Table S1.** Incidence of irAEs in NSCLC population.

|                   | NSCLC n=67 (%) | <70 n=27 (%) | ≥70 n=40 (%) | p (<70 vs ≥70)        |
|-------------------|----------------|--------------|--------------|-----------------------|
| Type of irAEs     | irAes n = 39   | irAes n = 10 | irAes n = 19 |                       |
| Pneumonitis       | 6 (9.0)        | 4 (14.8)     | 2 (5.0)      | <i>p</i> =0.168       |
| Colitis           | 6 (9.0)        | 2 (7.4)      | 4 (10.0)     | <i>p</i> =0.715       |
| Hepatitis         | 1 (1.5)        | 1 (3.7)      | 0 (0.0)      | <i>p</i> =0.220       |
| Skin reactions    | 11 (16.4)      | 1 (3.7)      | 10 (25.0)    | <b><i>p</i>=0.021</b> |
| Rheumatological   | 5 (7.5)        | 2 (7.4)      | 3 (7.5)      | <i>p</i> =0.989       |
| Endocrine related | 12 (17.9)      | 8 (29.6)     | 4 (10.0)     | <b><i>p</i>=0.040</b> |

**Table S2.** Incidence of irAEs in melanoma population.

|                   | melanoma n=46 (%) | <70 n=17 (%) | ≥70 n=29 (%) | p (<70 vs ≥70)        |
|-------------------|-------------------|--------------|--------------|-----------------------|
| Type of irAEs     | irAes n = 32      | irAes n = 18 | irAes n = 14 |                       |
| Pneumonitis       | 4 (8.7)           | 2 (11.8)     | 2 (6.9)      | <i>p</i> =0.572       |
| Colitis           | 8 (17.4)          | 4 (23.5)     | 4 (13.8)     | <i>p</i> =0.400       |
| Hepatitis         | 1 (2.2)           | 1 (5.9)      | 0 (0.0)      | <i>p</i> =0.187       |
| Skin reactions    | 7 (15.2)          | 2 (11.8)     | 5 (17.2)     | <i>p</i> =0.618       |
| Rheumatological   | 4 (8.7)           | 3 (17.6)     | 1 (3.4)      | <i>p</i> =0.099       |
| Endocrine related | 8 (17.4)          | 6 (35.3)     | 2 (6.9)      | <b><i>p</i>=0.014</b> |

**Table S3.** Incidence of irAEs in RCC population.

|                   | RCC n= 33 (%) | <70 n=13 (%) | ≥70 n=20 (%) | p (<70 vs ≥70)  |
|-------------------|---------------|--------------|--------------|-----------------|
| Type of irAEs     | irAes n = 40  | irAes n = 17 | irAes n = 23 |                 |
| Pneumonitis       | 4 (12.1)      | 0 (0.0)      | 4 (20.0)     | <i>p</i> =0.085 |
| Colitis           | 5 (15.5)      | 2 (15.4)     | 3 (15.0)     | <i>p</i> =0.976 |
| Hepatitis         | 4 (12.1)      | 2 (15.4)     | 2 (10.0)     | <i>p</i> =0.643 |
| Skin reactions    | 9 (27.3)      | 3 (23.1)     | 6 (30.0)     | <i>p</i> =0.663 |
| Rheumatological   | 4 (12.1)      | 3 (23.1)     | 1 (5.0)      | <i>p</i> =0.120 |
| Endocrine related | 14 (42.4)     | 7 (53.8)     | 7 (35.0)     | <i>p</i> =0.284 |
